# Supplementary material for: Robust Innate Immunity of Young Rabbits Mediates Resistance to Rabbit Hemorrhagic Disease Caused by Lagovirus Europaeus GI.1 But Not GI.2
Source: PubMed Central journal article supplement (PMC6163550; doi:10.3390/v10090512), 2018-09-19
Supplement: viruses-10-00512-s001.pdf [file viruses-10-00512-s001.pdf]

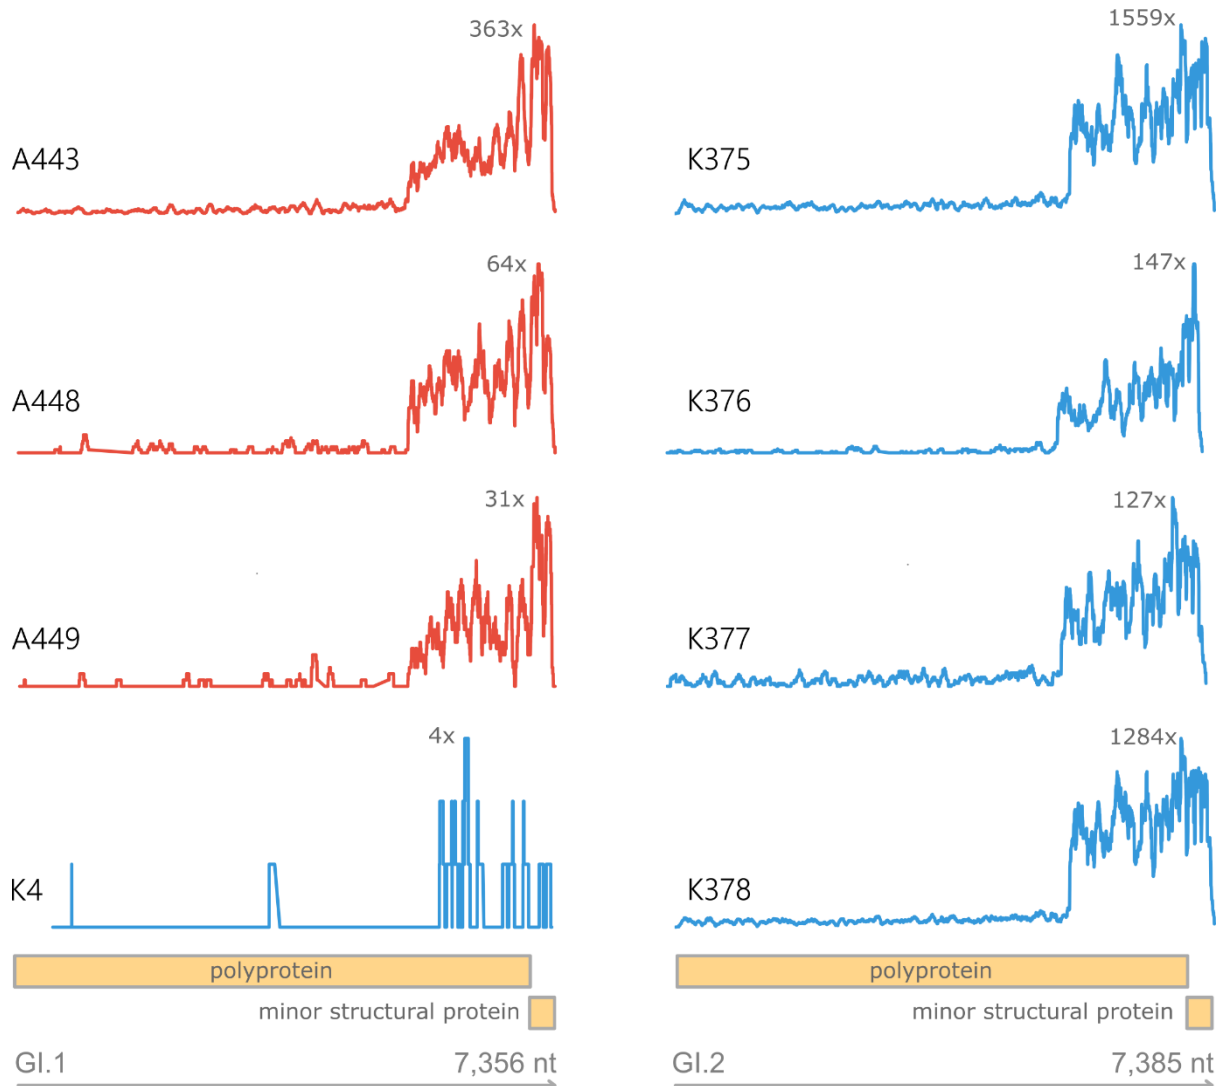

**Supplementary Figure 1. Read coverage of the GI.1 and GI.2 genomes.** The left panel shows viral genome coverage in rabbits infected with GI.1 and the right with GI.2. Red lines indicate adults, blue lines indicate kittens, and the highest coverage peak for each sample is annotated in grey text. Only samples with more than 20 reads mapping to the viral genomes are shown (see Table 1).

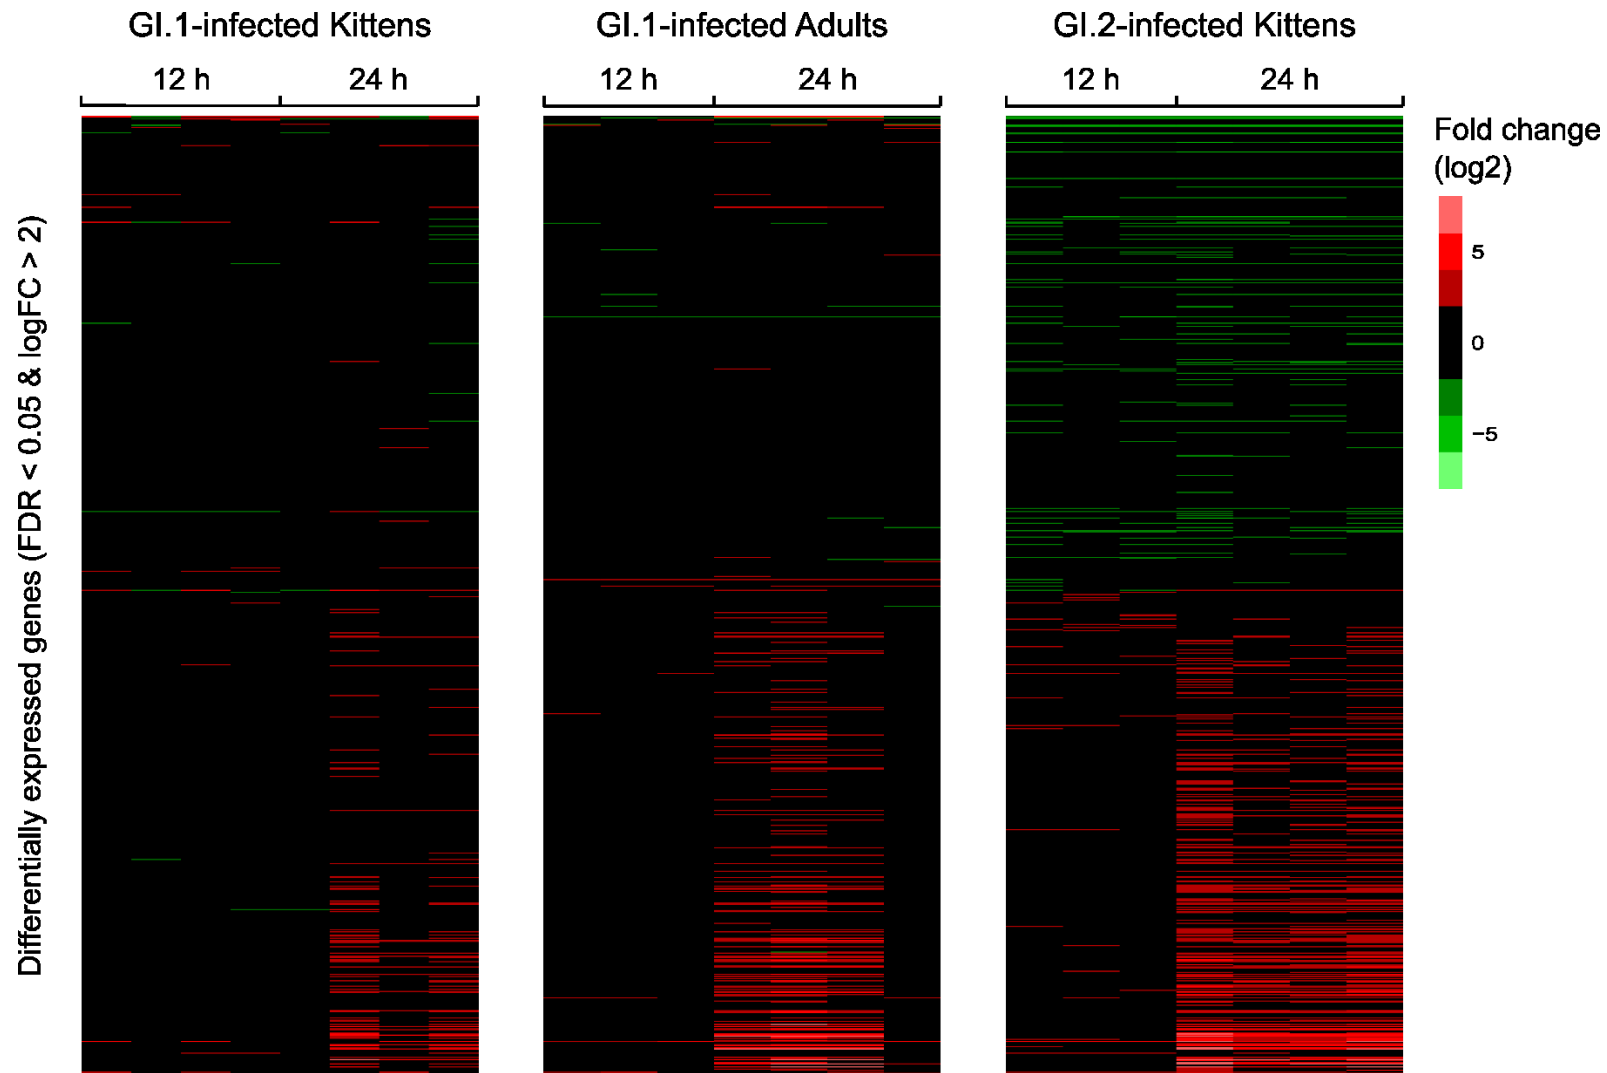

**Supplementary Figure 2. Significantly differentially expressed genes in infected rabbits compared to controls.** Kittens infected with GI.2 showed a greater transcriptional response compared to the other treatment groups, evidenced by more differentially expressed genes. In particular, more genes were down-regulated and changes were clearly detectable by 12 hours post-infection. FDR is “false discovery rate” and FC is “fold change”.

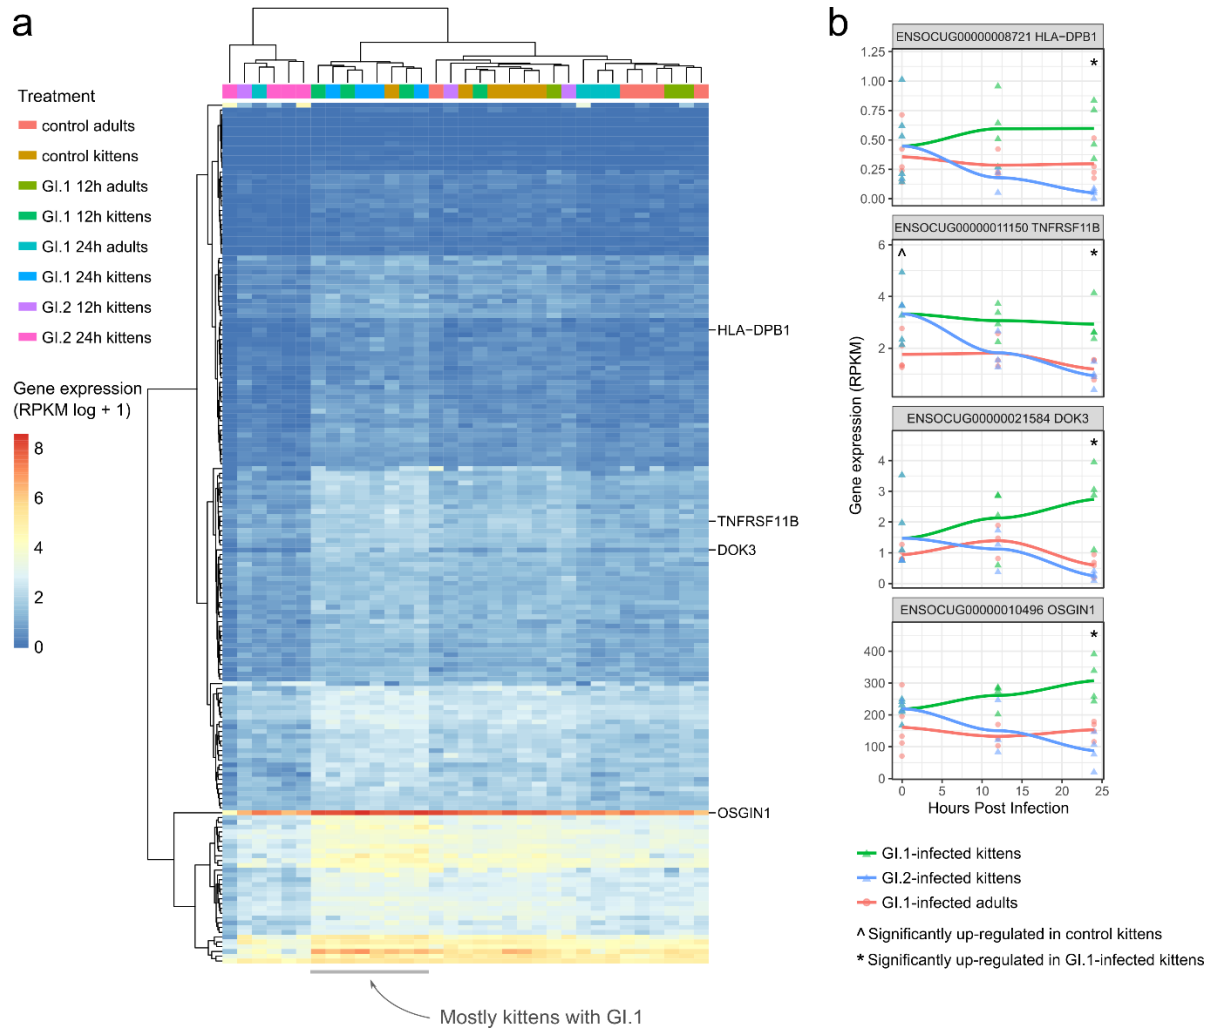

**Supplementary Figure 3. Expression of genes in the “pink” co-expression module (a) and change in selected genes over time (b).** Genes in this co-expression cluster tended to be up-regulated in control kittens, further up-regulated in GI.1-infected kittens but down-regulated in GI.2-infected kittens, suggesting a role in the resistance of kittens to GI.1. Gene expression was normalised using reads per kilobase per million (RPKM). In (b) the header in each plot gives the Ensembl gene accession followed by the gene symbol.

**Supplementary Table S1.** The top 10 most differentially expressed genes in GI.2-infected rabbits.

| Ensembl gene #                | Annotation                                                           | Log fold change | FDR*     |
|-------------------------------|----------------------------------------------------------------------|-----------------|----------|
| <i>Kittens after 12 hours</i> |                                                                      |                 |          |
| ENSOCUG00000024623            | N/A                                                                  | -6.2            | 1.04E-15 |
| ENSOCUG0000002051             | N/A                                                                  | -8.0            | 3.52E-11 |
| ENSOCUG00000025827            | <i>NAT8</i> (N-acetyltransferase 8 (putative))                       | -4.1            | 2.83E-10 |
| ENSOCUG00000020913            | N/A                                                                  | 6.1             | 9.03E-10 |
| ENSOCUG00000028214            | N/A                                                                  | -7.6            | 7.96E-09 |
| ENSOCUG00000012529            | N/A                                                                  | 1.9             | 1.28E-08 |
| ENSOCUG00000029158            | N/A                                                                  | -5.0            | 1.28E-08 |
| ENSOCUG00000024402            | N/A                                                                  | 2.6             | 2.25E-08 |
| ENSOCUG00000003017            | <i>ERICH3</i> (glutamate rich 3)                                     | 3.6             | 2.59E-08 |
| ENSOCUG00000000308            | N/A                                                                  | -8.6            | 2.80E-08 |
| <i>Kittens after 24 hours</i> |                                                                      |                 |          |
| ENSOCUG00000011697            | <i>VCAM1</i> (vascular cell adhesion molecule 1)                     | 2.7             | 4.00E-30 |
| ENSOCUG00000000023            | <i>PKP2</i> (plakophilin 2)                                          | 2.5             | 1.60E-24 |
| ENSOCUG00000024623            | N/A                                                                  | -6.5            | 2.46E-22 |
| ENSOCUG00000025827            | <i>NAT8</i> (N-acetyltransferase 8 (putative))                       | -5.3            | 1.96E-21 |
| ENSOCUG00000026273            | N/A                                                                  | 2.7             | 2.42E-21 |
| ENSOCUG00000000128            | <i>C21orf91</i> (chromosome 21 open reading frame 91)                | 3.8             | 2.53E-21 |
| ENSOCUG00000004804            | <i>FLVCR1</i> (feline leukemia virus subgroup C cellular receptor 1) | 3.4             | 4.60E-20 |
| ENSOCUG00000029644            | <i>ICAM1</i> (intercellular adhesion molecule 1)                     | 3.1             | 8.08E-20 |
| ENSOCUG00000002819            | <i>IRAK2</i> (interleukin 1 receptor associated kinase 2)            | 2.3             | 1.70E-19 |
| ENSOCUG00000007089            | <i>PLK2</i> (polo like kinase 2)                                     | 1.8             | 3.09E-19 |

\* FDR is the False Discovery Rate

N/A indicates unannotated genes

**Supplementary Table S2.** Significantly enriched Gene Ontology (GO) terms in the category “Biological Process” for up regulated genes in GI.2-infected rabbits.

| GO #                          | Term                                                                 | Annotated | Significant | Expected | p-value  |
|-------------------------------|----------------------------------------------------------------------|-----------|-------------|----------|----------|
| <i>Kittens after 12 hours</i> |                                                                      |           |             |          |          |
| GO:0005975                    | carbohydrate metabolic process                                       | 515       | 23          | 9.76     | 2.60E-08 |
| GO:0051968                    | positive regulation of synaptic transmission, glutamatergic          | 10        | 4           | 0.19     | 2.40E-05 |
| GO:0045332                    | phospholipid translocation                                           | 21        | 5           | 0.4      | 3.70E-05 |
| GO:0042493                    | response to drug                                                     | 104       | 10          | 1.97     | 0.00021  |
| GO:0008152                    | metabolic process                                                    | 8367      | 171         | 158.52   | 0.00054  |
| GO:0071625                    | vocalization behavior                                                | 10        | 3           | 0.19     | 0.00073  |
| GO:0019318                    | hexose metabolic process                                             | 117       | 7           | 2.22     | 0.00114  |
| GO:0060291                    | long-term synaptic potentiation                                      | 28        | 4           | 0.53     | 0.0018   |
| GO:0042886                    | amide transport                                                      | 175       | 9           | 3.32     | 0.0025   |
| GO:0034446                    | substrate adhesion-dependent cell spreading                          | 60        | 5           | 1.14     | 0.00263  |
| <i>Kittens after 24 hours</i> |                                                                      |           |             |          |          |
| GO:0045071                    | negative regulation of viral genome replication                      | 27        | 20          | 3.23     | 1.20E-13 |
| GO:0071260                    | cellular response to mechanical stimulus                             | 34        | 19          | 4.07     | 8.50E-10 |
| GO:0051607                    | defense response to virus                                            | 106       | 46          | 12.68    | 2.80E-09 |
| GO:0045944                    | positive regulation of transcription from RNA polymerase II promoter | 710       | 144         | 84.91    | 6.10E-09 |
| GO:0050729                    | positive regulation of inflammatory response                         | 55        | 22          | 6.58     | 1.20E-08 |
| GO:0006955                    | immune response                                                      | 672       | 190         | 80.36    | 1.30E-08 |
| GO:0071222                    | cellular response to lipopolysaccharide                              | 98        | 38          | 11.72    | 4.30E-08 |
| GO:0043123                    | positive regulation of I-kappaB kinase/NF-kappaB signaling           | 123       | 38          | 14.71    | 1.90E-07 |
| GO:0035455                    | response to interferon-alpha                                         | 12        | 9           | 1.44     | 7.70E-07 |
| GO:0001961                    | positive regulation of cytokine-mediated signalling pathway          | 18        | 11          | 2.15     | 9.90E-07 |
